# Supplementary material for: Retrieving tropospheric NO 2 vertical column densities around the city of Beijing and estimating NO x emissions based on carMAX-DOAS measurements
Source: Copernicus journal article supplement (doi:10.5194/acp-2020-316), 2020-06-22
Supplement: Supplementary file 1 [file acp-2020-316-supplement.pdf]

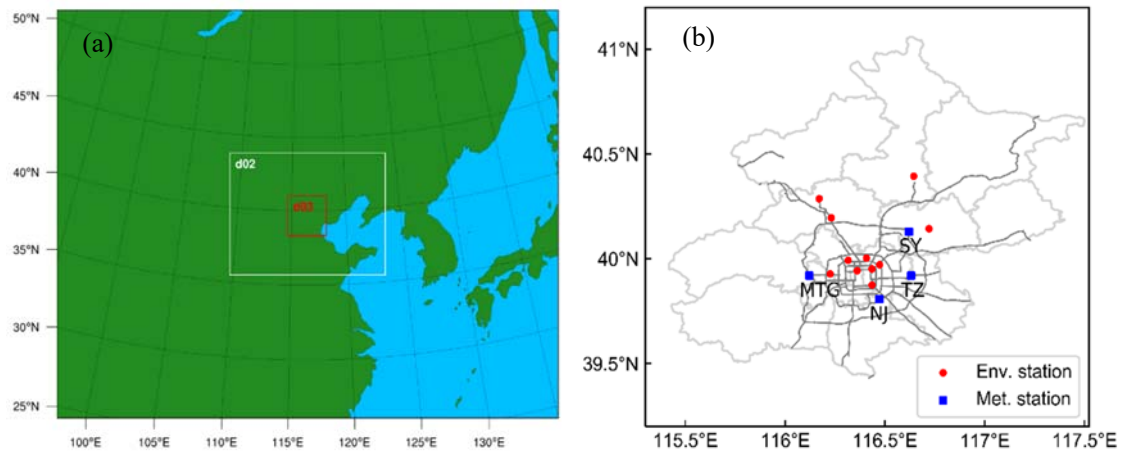

**Fig.1S** Triple-nested domains of (a) the LAPS-WRF-CMAQ model system and (b) the distribution of meteorological/environmental monitoring stations.

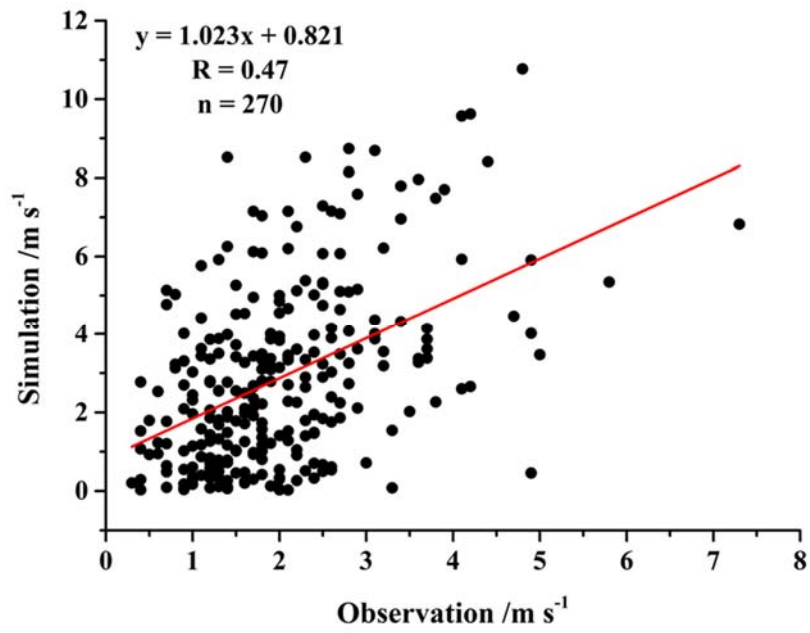

**Fig.2S** Scatterplot of simulated wind speed and observations at four stations in Beijing.

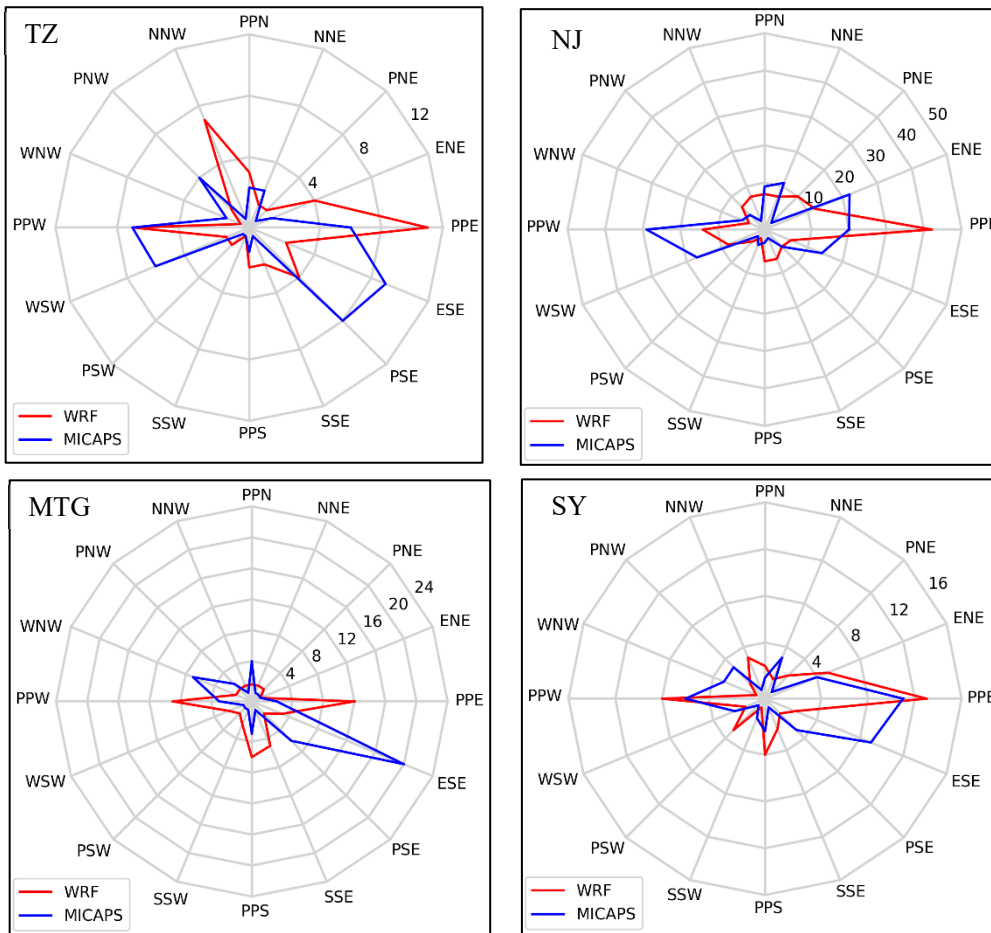

**Fig.3S** Wind rose of simulated wind direction and observations from MICAPS datasets at four stations in Beijing.

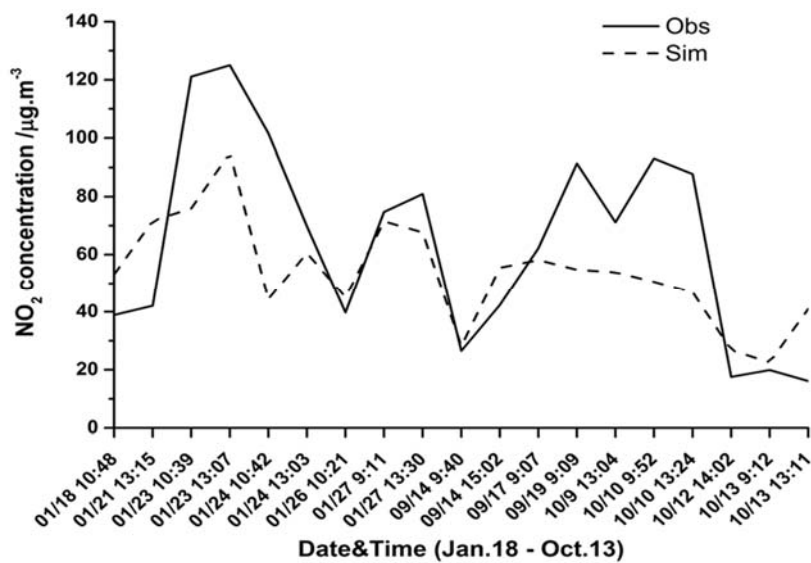

**Fig.4S** Time series of regional average simulation and in situ observation of NO<sub>2</sub> concentration at 12 stations in Beijing.

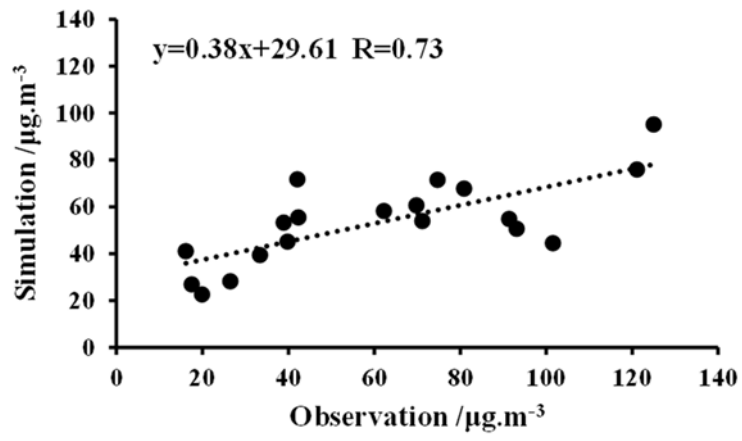

**Fig.5S** Scatter plot between regional average simulation and observation of NO<sub>2</sub> concentration at 12 stations in Beijing.
